## CORRECTION

# Correction: The contribution of energy systems during 30-second lower body Wingate anaerobic test in combat sports athletes: Intermittent versus single forms and gender comparison

The *PLOS ONE* Editors

## Notice of Republication

This article [1] was republished on June 4th, 2024, to address an issue identified post-publication. An updated version of [S1 File](#) is provided with this notice. Please download this article again to view the correct version.

The article's Data Availability statement is updated to: All relevant data are within the paper and its Supporting Information file.

## Supporting information

**S1 File. Underlying dataset.** A) Descriptive characteristics of athletes including age range, height, weight; B) Wingate test outputs, including metrics such as peak power, mean power, and fatigue index; C) Oxygen Consumption (O<sub>2</sub>) Data for two different Wingate test protocols, providing comparative insights into athletes' oxygen consumption during these tests. (ZIP)

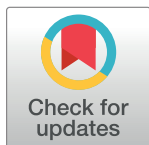

## Reference

1. Tortu E, Ouerghi I, Ulupinar S, Özbay S, Gençoğlu C, Ardigo LP (2024) The contribution of energy systems during 30-second lower body Wingate anaerobic test in combat sports athletes: Intermittent versus single forms and gender comparison. *PLoS ONE* 19(5): e0303888. <https://doi.org/10.1371/journal.pone.0303888> PMID: 38787849

## OPEN ACCESS

**Citation:** The *PLOS ONE* Editors (2024) Correction: The contribution of energy systems during 30-second lower body Wingate anaerobic test in combat sports athletes: Intermittent versus single forms and gender comparison. *PLoS ONE* 19(6): e0306361. <https://doi.org/10.1371/journal.pone.0306361>

**Published:** June 27, 2024

**Copyright:** © 2024 The PLOS ONE Editors. This is an open access article distributed under the terms of the [Creative Commons Attribution License](#), which permits unrestricted use, distribution, and reproduction in any medium, provided the original author and source are credited.
